# Supplementary material for: The Role of Uniform Meropenem Usage in Acinetobacter baumannii Clone Replacement
Source: PubMed Central journal article supplement (PMC7911629; doi:10.3390/antibiotics10020127), 2021-01-29
Supplement: antibiotics-10-00127-s001.pdf [file antibiotics-10-00127-s001.pdf]

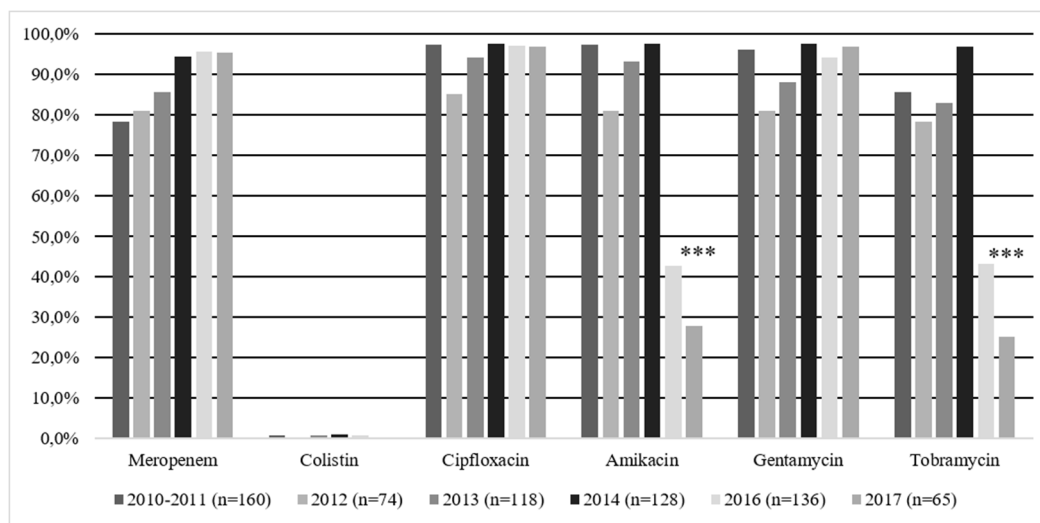

**Figure S1.** Results of the Kirby-Bauer disk diffusion tests, based on EUCAST recommendation. Significance levels: \*→ $p < 0.05$ ; \*\*→ $p < 0.01$ ; \*\*\*→ $p < 0.001$ .

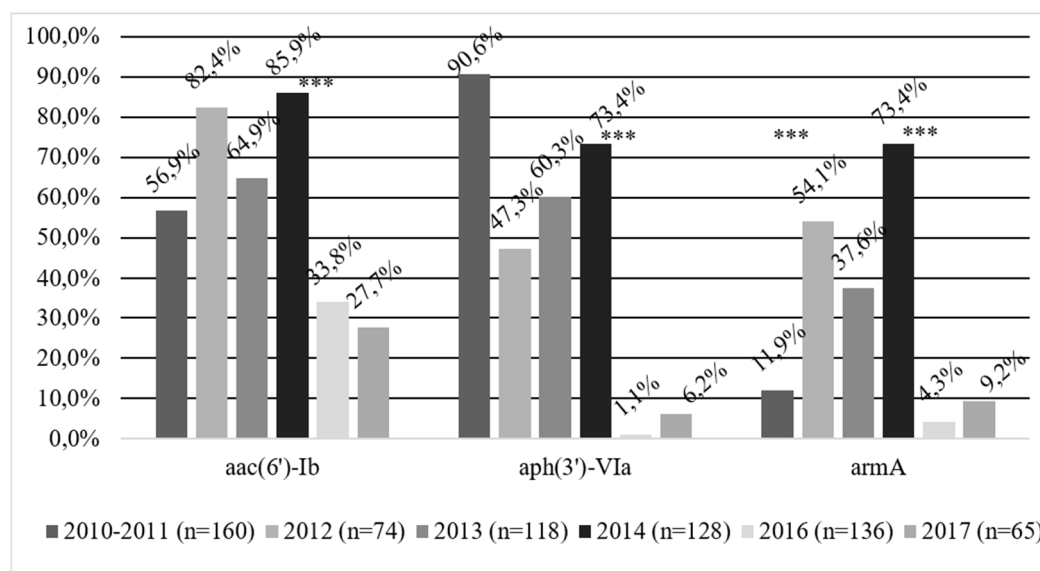

**Figure S2.** The prevalence of aminoglycoside resistance genes among the *A. baumannii* isolates by year. Significance levels: \*→ $p < 0.05$ ; \*\*→ $p < 0.01$ ; \*\*\*→ $p < 0.001$ .

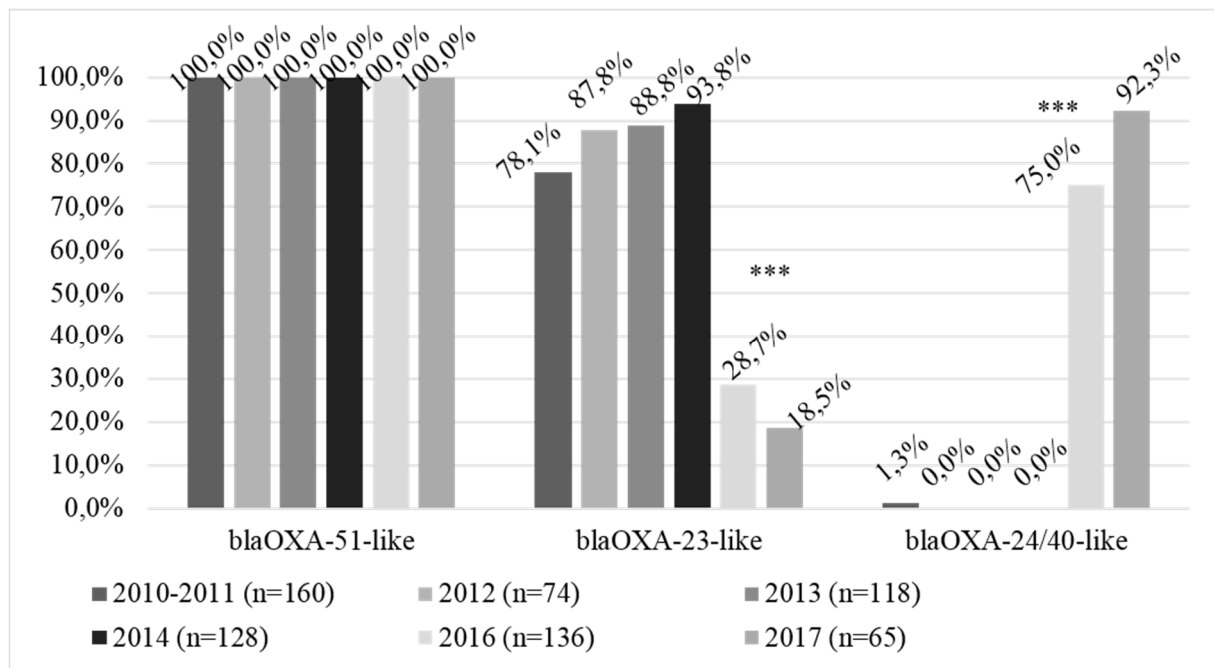

**Figure S3.** The prevalence of carbapenemases among the *A. baumannii* by years. Significance levels: \* $\rightarrow p < 0.05$ ; \*\* $\rightarrow p < 0.01$ ; \*\*\* $\rightarrow p < 0.001$ .
